# Supplementary material for: Postnatal Ontogeny of the Cranial Base and Craniofacial Skeleton in Male C57BL/6J Mice: A Reference Standard for Quantitative Analysis
Source: PubMed Central journal article supplement (PMC4709510; doi:10.3389/fphys.2015.00417), 2016-01-12
Supplement: SupplementaryData.pdf [file SupplementaryData.pdf]

## Supplementary Material

### Postnatal ontogeny of the cranial base and craniofacial skeleton in male C57BL/6J mice: A reference standard for quantitative analysis

Siddharth R. Vora<sup>1,2,4</sup>, Esra D. Camci<sup>1,4</sup> & Timothy C. Cox<sup>3,4,5</sup>\*

**\* Correspondence:**

Prof Timothy C. Cox  
Center for Developmental Biology & Regenerative Medicine  
Seattle Children's Research Institute  
M/S C9S-5  
1900 9<sup>th</sup> Avenue  
Seattle, WA, 98101, USA  
[tccox@uw.edu](mailto:tccox@uw.edu)

**Supplementary Figure 1. Landmarks used in this study (shown on a P56 skull).**  
Descriptions of landmarks are provided in Supplementary Table 1.

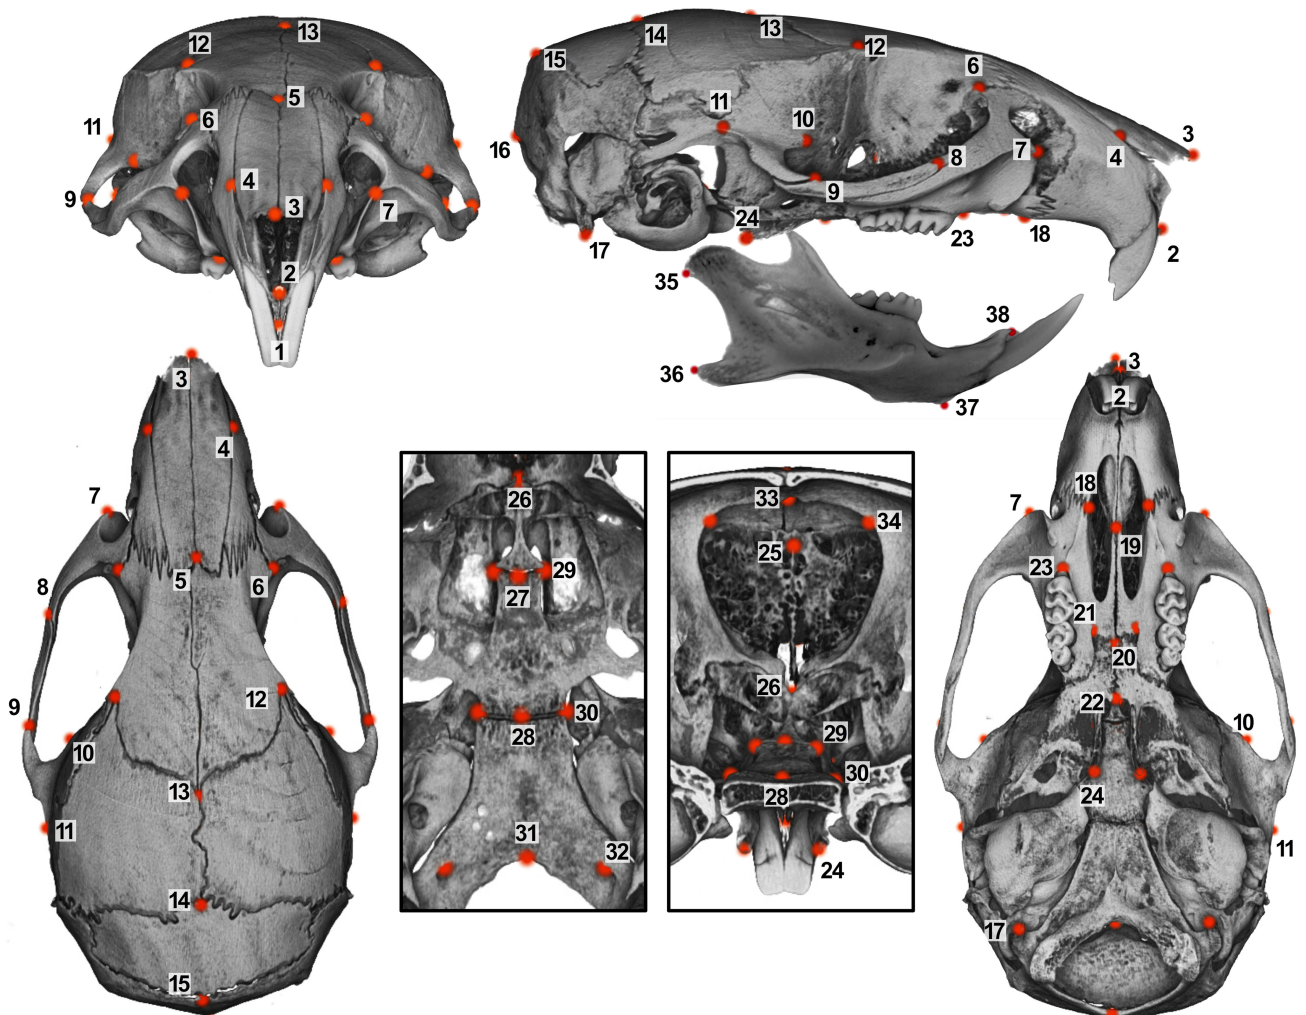

**Supplementary Figure 2. Measurement of plane-projected distances for analysis of antero-posterior growth.**

Micro-CT scan of a representative P28 animal with constructed mid-sagittal and transverse planes (**top**), with a slice view through the mid-sagittal plane (**bottom**). Landmarks #1, #18 (right), #20 and #22, which are used to measure the premaxillary, maxillary and palatal bones, are shown in red (see Supplementary Figure 1 and Supplementary Table 1). Parallel axial planes (perpendicular to the mid-sagittal and transverse planes) are constructed through these landmarks and the distance between them measures the A-P dimension of the individual bones. For bilaterally paired landmarks (e.g. #18 shown here), an average of the right and left measurement is for analysis.

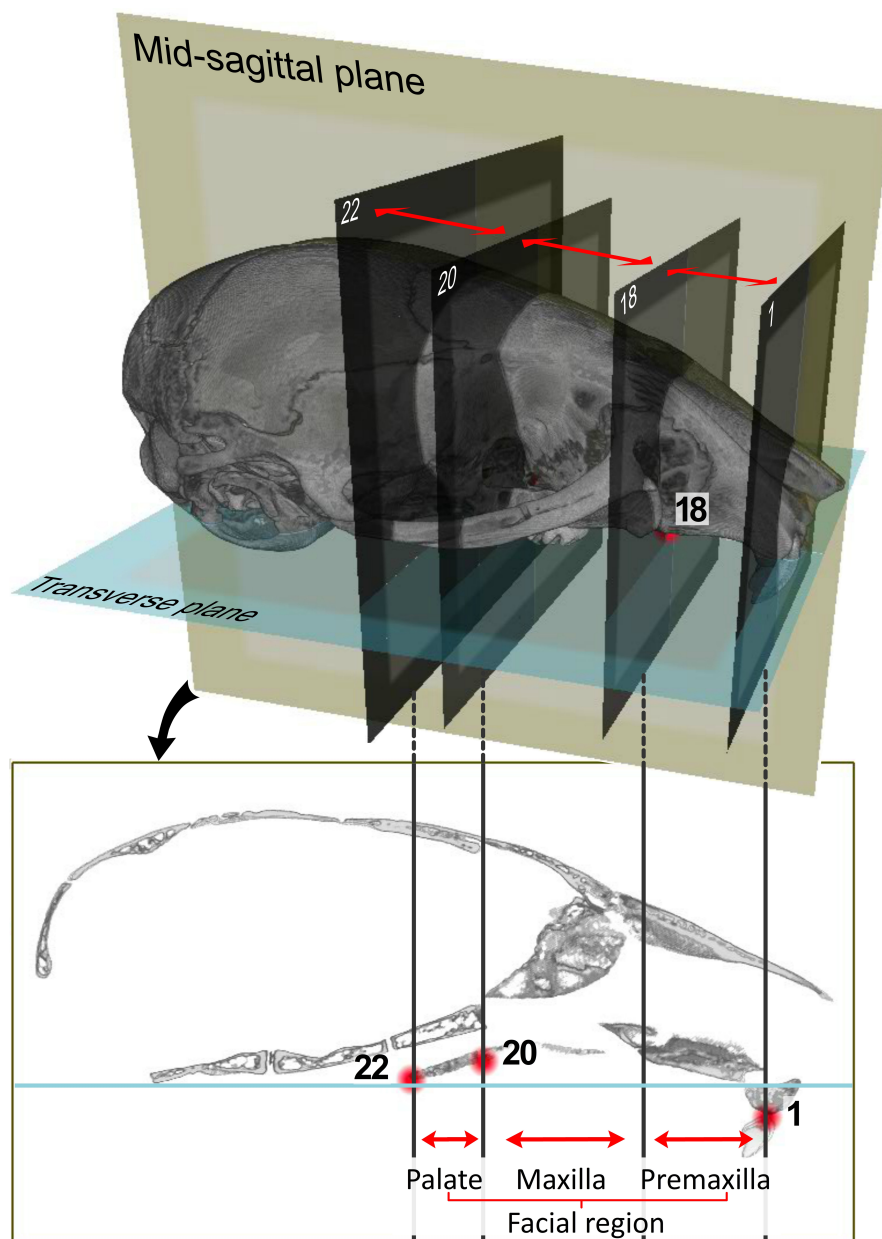

**Supplementary Table 1. List of landmarks used to derive craniofacial measurement.**  
 Mouse skull with annotated landmarks is shown in Supplementary Figure 1.

| #  | Description                                                                                | Type   |
|----|--------------------------------------------------------------------------------------------|--------|
| 1  | Midpoint mesial to maxillary incisors                                                      | Single |
| 2  | Anterior point at base of nasal aperture                                                   | Single |
| 3  | Nasale                                                                                     | Single |
| 4  | Anterior point on intersection of premaxillary and nasal bones                             | Paired |
| 5  | Nasion                                                                                     | Single |
| 6  | Intersection of maxilla, frontal and lacrimal bones                                        | Paired |
| 7  | Anterior-superior point on zygomatic process of maxilla (lateral to infra orbital fissure) | Paired |
| 8  | Anterior end of zygomatic bone                                                             | Paired |
| 9  | Posterior end of zygomatic bone                                                            | Paired |
| 10 | Anterior point on base of zygomatic process of temporal bone                               | Paired |
| 11 | Posterior point on base of zygomatic process of temporal bone                              | Paired |
| 12 | Most prominent lateral point on frontal-parietal suture                                    | Paired |
| 13 | Bregma                                                                                     | Single |
| 14 | Lamda                                                                                      | Single |
| 15 | Mid-sagittal point of intersection of interparietal and occipital bones                    | Single |
| 16 | Ophisthion                                                                                 | Single |
| 17 | Lateral point on mastoid process                                                           | Paired |
| 18 | Lateral premaxillary - maxillary suture                                                    | Paired |
| 19 | Medial premaxillary - maxillary junction                                                   | Single |
| 20 | Midline point on maxillary-palatal suture                                                  | Single |
| 21 | Anterior point on palatine foramen                                                         | Paired |
| 22 | Posterior point on palate                                                                  | Single |
| 23 | Crest of alveolar process (mesial to 1st molar)                                            | Paired |
| 24 | Posterior point on pterygoid process                                                       | Paired |
| 25 | Spine of ethmoidal crest                                                                   | Single |
| 26 | Anterior point on midline of presphenoid (junction with ethmoid)                           | Single |
| 27 | Intesphenoidal synchondrosis (mid-point of endocranial rostral margin of basisphenoid)     | Single |
| 28 | Spheno-occipital synchondrosis (mid-point of endocranial caudal margin of basisphenoid)    | Single |
| 29 | Lateral point of endocranial rostral margin of basisphenoid                                | Paired |
| 30 | Lateral point of endocranial caudal margin of basisphenoid                                 | Paired |
| 31 | Basion                                                                                     | Single |
| 32 | Anterior-medial point on hypoglossal canal                                                 | Paired |
| 33 | Mid-point on interior crest of frontal bone                                                | Single |
| 34 | Superior-lateral point on interior crest of frontal bone                                   | Paired |
| 35 | Posterior inferior point on mandibular condyle                                             | Single |
| 36 | Posterior tip of the angular process                                                       | Single |
| 37 | Anterior inferior most point on the body of the mandible                                   | Single |
| 38 | Midpoint on alveolar bone lingual to mandibular incisor                                    | Single |
